# Supplementary material
Source: PubMed Central journal article supplement (PMC3491551)
Supplement: CVI.00291-12_zcd999094580so1.pdf [file CVI.00291-12_zcd999094580so1.pdf]

# Identification of Synthetic Host Defense Peptide Mimics that Exert Dual Antimicrobial and Anti-Inflammatory Activities

Abhigyan Som<sup>a,b</sup>, Nicolás Navasa<sup>b</sup>, Avital Percher<sup>a,b</sup>, Richard W. Scott<sup>c</sup>, Gregory N.

Tew<sup>a,b,#</sup>, Juan Anguita<sup>b,d,e#</sup>

Departments of <sup>a</sup> Polymer Science & Engineering and <sup>b</sup> Veterinary & Animal Sciences,  
University of Massachusetts, Amherst, MA 01003

<sup>c</sup> Polymedix Inc., 170 N. Radnor Chester Road, Suite 300, Radnor, PA 19087

<sup>d</sup> CIC bioGUNE, Technological Park of Bizkaia, 48160 Derio, Bizkaia, Spain and <sup>e</sup> Ikerbasque  
Foundation, 48011 Bilbao, Spain.

**Running Title:** Antiinflammatory Antimicrobial Oligomers

## Correspondence:

Juan Anguita, PhD. CIC bioGUNE. Proteomics Unit. Technological Park of Bizkaia. 48160  
Derio, Bizkaia, Spain. +34 944 061 311; [janguita@cicbiogune.es](mailto:janguita@cicbiogune.es).

Gregory Tew, PhD. UMass Amherst. Dept of Polymer Sciences and Engineering. 120 Governors  
Dr. Amherst, MA 01003. (413) 577-1612; [tew@mail.pse.umass.edu](mailto:tew@mail.pse.umass.edu).

**Supporting Information**

**Scheme S1.** Chemical structures of SMAMPs 01-03.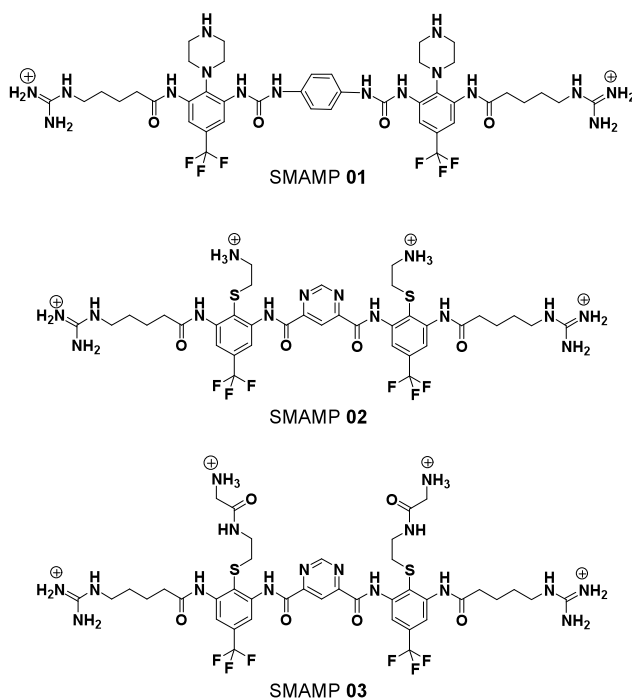**Table S1.** Antimicrobial activity, cytotoxicity and maximum tolerated dose (MTD) of SMAMPs 01-03.

|          | MIC <sub>90</sub> <sup>a</sup> (μg/ml) |                                  | Cytotoxicity <sup>b</sup> (EC <sub>50</sub> in μM) |     |     | MTD <sup>c</sup> (mg/kg) |
|----------|----------------------------------------|----------------------------------|----------------------------------------------------|-----|-----|--------------------------|
|          | <i>E. coli</i><br>(ATCC 25922)         | <i>S. aureus</i><br>(ATCC 27660) | HC <sub>50</sub>                                   | 3T3 | HG2 |                          |
| SMAMP 01 | 1.56                                   | 0.195                            | 174                                                | 237 | 206 | n.d.                     |
| SMAMP 02 | 0.78                                   | 0.195                            | 271                                                | 61  | 178 | 20                       |
| SMAMP 03 | 0.78                                   | 0.195                            | 241                                                | 103 | 160 | 30                       |

<sup>a</sup>Antimicrobial activity was quantified in terms of minimum inhibitory concentration (MIC); the lowest concentration of SMAMP that inhibits bacterial growth by more than 90%. These values were determined according to the Hancock method for cationic antimicrobial peptides, which is a modification of the classical microbroth dilution method recommended by the Clinical and Laboratory Standards Institute (CLSI) (3, 4). <sup>b</sup>HC<sub>50</sub> are reported as EC<sub>50</sub> against isolated human erythrocytes; cytotoxicity is reported as EC<sub>50</sub> against 3T3 cells (embryonic mouse fibroblast line) and HG2 cells (human transformed liver cell line) (1, 2). <sup>c</sup>Maximum tolerated dose in mice; mice were administered a single dose of SMAMP and clinical signs were recorded over a four-day to seven-day period following SMAMP administration. Gross necropsy was performed at the conclusion of the study and MTD values represent the highest dose where no adverse signs were recorded (1, 2).

**Table S2.** Broad spectrum antimicrobial activity and the cytotoxicity of SMAMPs 01-25.

| SMAMP    | MIC <sub>90</sub><br>(µg/ml) |       |       |      |       | Cytotoxicity<br>(EC <sub>50</sub> in µM) |       |       |
|----------|------------------------------|-------|-------|------|-------|------------------------------------------|-------|-------|
|          | EC                           | SA    | EF    | PA   | KP    | HC <sub>50</sub>                         | 3T3   | HG2   |
| SMAMP 01 | 1.56                         | 0.195 | 1.56  | 6.25 | 1.56  | 174                                      | 237   | 206   |
| SMAMP 02 | 0.78                         | 0.195 | 0.39  | 3.13 | 0.39  | 271                                      | 61    | 178   |
| SMAMP 03 | 0.78                         | 0.195 | 1.56  | 6.25 | 1.56  | 241                                      | 103   | 160   |
| SMAMP 04 | 12.5                         | 0.39  | 6.25  | 6.25 | 12.5  | 64.53                                    | -     | -     |
| SMAMP 05 | 0.39                         | 0.195 | 1.56  | 25   | 1.56  | 526.9                                    | 594   | 843   |
| SMAMP 06 | 0.78                         | 0.098 | 0.39  | 1.56 | 0.78  | 114.405                                  | 128   | 145   |
| SMAMP 07 | 1.56                         | 0.195 | -     | 12.5 | 0.78  | 651.4                                    | 727   | 684   |
| SMAMP 08 | 0.78                         | 0.39  | 0.78  | 3.13 | 1.56  | >1000                                    | 93    | 201   |
| SMAMP 09 | 3.13                         | 0.39  | 1.56  | 50   | 6.25  | >1000                                    | 221.7 | 139.6 |
| SMAMP 10 | 25                           | -     | -     | >50  | -     | >1000                                    | -     | -     |
| SMAMP 11 | 0.78                         | 0.195 | 0.195 | 6.25 | 0.78  | 167                                      | 179   | 480   |
| SMAMP 12 | 1.56                         | 0.78  | 3.13  | 100  | 3.13  | 775.9                                    | 822.8 | 132.1 |
| SMAMP 13 | 0.78                         | 0.098 | 0.39  | 3.13 | 1.56  | 94.05                                    | 235.3 | 206   |
| SMAMP 14 | 0.39                         | 0.39  | 0.39  | 25   | 3.13  | <0.4                                     | 75    | 12    |
| SMAMP 15 | 1.56                         | 0.39  | 0.78  | 25   | 12.5  | 4                                        | <16   | 24    |
| SMAMP 16 | 1.56                         | 1.56  | -     | 25   | 6.25  | 9                                        | 158   | 249   |
| SMAMP 17 | 0.195                        | 0.049 | 3.13  | >50  | 3.13  | -                                        | >1371 | >1371 |
| SMAMP 18 | 0.195                        | 0.098 | 3.13  | 12.5 | 0.195 | -                                        | 44    | 81    |
| SMAMP 19 | 0.78                         | 0.195 | 0.78  | 1.56 | 1.56  | 13.4                                     | 159   | 98.99 |
| SMAMP 20 | 12.5                         | 50    | 12.5  | 50   | 25    | >1000                                    | -     | -     |
| SMAMP 21 | 6.25                         | 3.13  | 3.13  | 50   | 12.5  | -                                        | 41    | 54    |
| SMAMP 22 | 0.78                         | 0.195 | 0.39  | 1.56 | 1.56  | 7.8                                      | 429.7 | >1000 |
| SMAMP 23 | 1.56                         | 0.39  | 0.78  | 12.5 | 0.78  | 2.23                                     | 44    | 28    |
| SMAMP 24 | 1.56                         | 0.195 | 1.56  | 50   | 3.13  | >1000                                    | 502   | 531   |
| SMAMP 25 | 3.13                         | 0.195 | 0.78  | 12.5 | 6.25  | 26                                       | >2000 | >2000 |

MIC<sub>90</sub>, minimum inhibitory concentration; EC, *Escherichia coli* ATCC 25922; SA, *Staphylococcus aureus* ATCC 27660; EF, *Enterococcus faecalis* ATCC 29212; PA, *Pseudomonas aeruginosa* ATCC 10145; KP, *Klebsiella pneumoniae* ATCC 13883. HC<sub>50</sub> are reported as EC<sub>50</sub> against isolated human erythrocytes; cytotoxicity is reported as EC<sub>50</sub> against 3T3 cells (embryonic mouse fibroblast line) and HG2 cells (human transformed liver cell line) (1, 2).

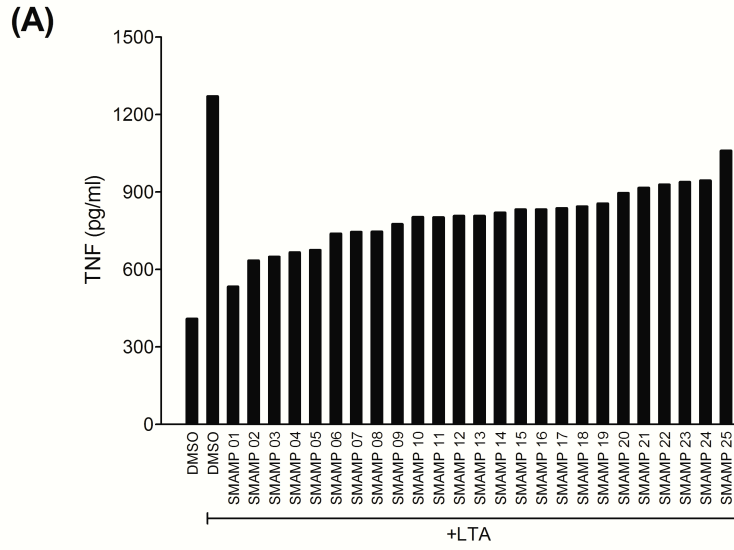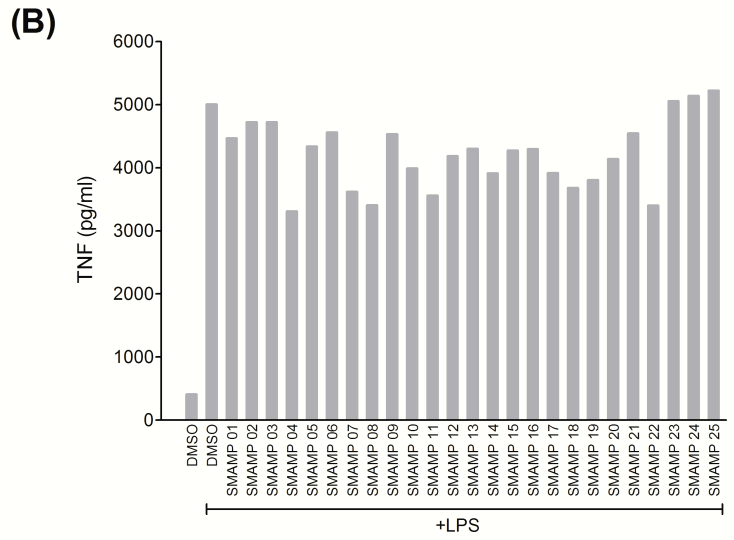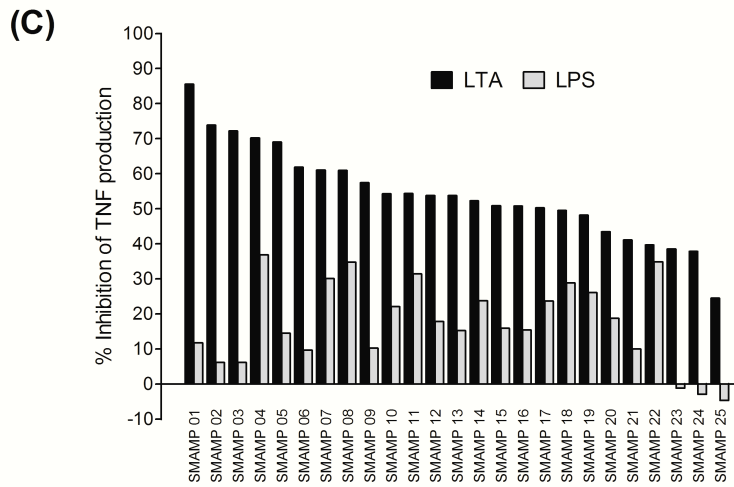

**Figure S1.** Identification of SMAMPs that thwart the stimulatory capacity of LTA or LPS in RAW264.7 cells. RAW 264.7 cells ( $1 \times 10^6$  cells/ml) cells were stimulated with (a) LTA (10  $\mu\text{g/ml}$ ) (solid bars) or (b) LPS (100 ng/ml) (grey bars) in the presence of 25 different SMAMPs (1.0  $\mu\text{g/ml}$ ). TNF production in the supernatants was assessed by ELISA after 12 h of stimulation. 0.01% DMSO was used as control as each SMAMP solution has 0.01% DMSO content. (c) The percentage of TNF production inhibition mediated by SMAMPs was then calculated. Stimulations with 0.01% DMSO (control) and LTA/LPS in the absence of SMAMPs were taken as 100% and 0% inhibition, respectively. RAW 264.7 cells ( $1 \times 10^6$  cells/ml) were pretreated with SMAMPs for 1h before LTA/LPS stimulation.

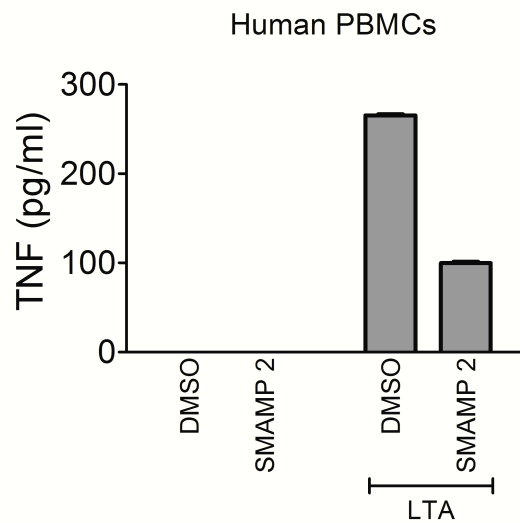

**Figure S2.** PBMC cells ( $0.8 \times 10^6$  cells/ml) were pre-incubated with SMAMP 2 (5.0  $\mu\text{g/ml}$ ) or 0.05% DMSO (control) for 1 h and stimulated with LTA (10  $\mu\text{g/ml}$ ) for 20 h. The stimulation supernatants were analyzed for TNF production by ELISA. The data are presented as the average  $\pm$  s.e.m of triplicate samples.

## Supplemental Methods:

**Mouse bone marrow derived macrophages (BMDM) cells.** Mouse bone marrow cells were collected from the femoral shafts by flushing three times with 1 ml of cold complete RPMI 1640 supplemented with 20% L929-conditioned RPMI 1640. The cell suspensions were cultured in 100 × 15-mm petri dishes (Fisher Scientific, Pittsburgh, PA) in 20% L929-conditioned RPMI 1640 for 8 days at 37°C with 5% CO<sub>2</sub>. Following incubation, non-adherent cells were eliminated and the adherent macrophages were scraped, counted, and resuspended in RPMI 1640 medium.

**Human peripheral blood mononuclear cells (PBMCs) stimulation with LTA.** PBMCs ( $0.8 \times 10^6$  cells) were seeded in 24 well plates in 1 ml of complete RPMI media. After 2 h, cells were incubated with 5 µg/ml SMAMP for 1h, and then stimulated with LTA (10 µg/ml). The cells were incubated for 20 h, and the supernatants were assessed for TNF by ELISA (BD Biosciences) per the manufacturer's instructions (see Figure S2).

## Supplementary References:

1. **Choi S, Isaacs A, Clements D, Liu DH, Kim H, Scott RW, Winkler JD, DeGrado WF.** 2009. De novo design and in vivo activity of conformationally restrained antimicrobial arylamide foldamers. *Proc. Natl. Acad. Sci. USA.* **106**:6968-6973.
2. **Scott R, DeGrado W, Tew G.** 2008. De novo designed synthetic mimics of antimicrobial peptides. *Curr. Opin. Biotechnol.* **19**:620-627.
3. **Steinberg DA, Hurst MA, Fujii CA, Kung AHC, Ho JF, Cheng FC, Lounsbury DJ, Fiddes JC.** 1997. Protegrin-1: A broad-spectrum, rapidly microbicidal peptide with in vivo activity. *Antimicrob. Agents Chemother.* **41**:1738-1742.
4. **Yan H, Hancock REW.** 2001. Synergistic interactions between mammalian antimicrobial defense peptides. *Antimicrob. Agents Chemother.* **45**:1558-1560.
